# Supplementary material for: Osterix-Cre marks distinct subsets of CD45- and CD45+ stromal populations in extra-skeletal tumors with pro-tumorigenic characteristics
Source: eLife. 2020 Aug 5;9:e54659. doi: 10.7554/eLife.54659 (PMC7428306; doi:10.7554/eLife.54659)
Supplement: Figure 1—source data 1. [file elife-54659-fig1-data1.xlsx]

## Sheet: SourceData-Figure 1
FACS analysis
B16-F10 no doxy			PyMT no doxy
WT;TdT	Osx-cre;TdT		WT;TdT	Osx-cre;TdT
0.32	19.4		0.627	12.9
0.435	10.6		0.61	18.5
0.573	8.31		0.43	16
				15
B16-F10 doxy			PyMT doxy
WT;TdT	Osx-cre;TdT		WT;TdT	Osx-cre;TdT
0	6.212		0.0227	11
0	5.645		0.0591	9.146
0	5.225		0.229	7.278
	3.782			8.227
	4.533
