# Supplementary material for: Osterix-Cre marks distinct subsets of CD45- and CD45+ stromal populations in extra-skeletal tumors with pro-tumorigenic characteristics
Source: eLife. 2020 Aug 5;9:e54659. doi: 10.7554/eLife.54659 (PMC7428306; doi:10.7554/eLife.54659)
Supplement: Figure 2—source data 1. [file elife-54659-fig2-data1.xlsx]

## Sheet: Source Data-Figure 2
Real Time PCR
B. Sp7 (Osx)					Sp7 (Osx) Log Transform Y=log(Y)						C. Runx2					Runx Log Transform Y=log(Y)						D. Bglap (Ocn)					Bglap (Ocn) Log Transform Y=log(Y)
TdT-Osx-	TdT-Osx+	iCAFs	bone		TdT-Osx-	TdT-Osx+	iCAFs	bone			TdT-Osx-	TdT-Osx+	iCAFs	bone		TdT-Osx-	TdT-Osx+	iCAFs	bone			TdT-Osx-	TdT-Osx+	iCAFs	bone		TdT-Osx-	TdT-Osx+	iCAFs	bone
0.1	4.97	4.05	73.74		-1	0.696356	0.607455	1.8677			0.425361	1.64568	2.96284	15.2953		-0.371243	0.216345	0.471708	1.18456			2.28	9.79	0.127275	125.736		0.357935	0.990783	-0.895257	2.09946
0.13	4.31	2.74	155.48		-0.886057	0.634477	0.437751	2.19167			0.184381	8.68015	1.9144	10.3444		-0.734285	0.938527	0.282032	1.01471			1.95	29.12	0.369957	293.99		0.290035	1.46419	-0.431848	2.46833
0.444831	3.17055	2.5	124.13		-0.351805	0.501134	0.39794	2.09388			8.17487	17.3925	2.22576	21.9318		0.912481	1.24036	0.347478	1.34107			0.0759567	0.0692486	0.205541	89.1039		-1.11943	-1.15959	-0.687102	1.9499
0.00168475	5.17924	2.15	143.33		-2.77346	0.714266	0.332438	2.15634			10.3225	2.45626	2.18668	31.4656		1.01378	0.390274	0.339785	1.49784			0.0155713	0.434898	0.339034	36.3141		-1.80768	-0.361613	-0.469757	1.56008
0.423902	7.65036				-0.372735	0.883682																3.93689	1.83534				0.595153	0.263717
0.366686	7.3394				-0.435705	0.865661																1.30765	3.61574				0.11649	0.558197
E. Ibsp (Bsp)					Ibsp (Bsp) Log Transform Y=log(Y)						F. Alpl (Tnap)					Alpl (Tnap) Log Transform Y=log(Y)						G. S100a4 (Fsp1)					S100a4 (Fsp1) Log Transform Y=log(Y)
TdT-Osx-	TdT-Osx+	iCAFs	bone		TdT-Osx-	TdT-Osx+	iCAFs	bone			TdT-Osx-	TdT-Osx+	iCAFs	bone		TdT-Osx-	TdT-Osx+	iCAFs	bone			TdT-Osx-	TdT-Osx+	iCAFs	bone		TdT-Osx-	TdT-Osx+	iCAFs	bone
0.0001403	3.08446	0.0329594	10.8959		-3.85294	0.489179	-1.48202	1.03726			0.00242227	0.28915	0.272568	4.11285		-2.61578	-0.538878	-0.564526	0.614143			1.16	17.43	46.0976	5.01232		0.064458	1.2413	1.66368	0.700039
0.00136675	0.030225	0.0163408	15.0068		-2.86431	-1.51963	-1.78673	1.17629			0.00379929	0.00575206	0.063334	2.73721		-2.4203	-2.24018	-1.19836	0.437309			1.92	20.03	27.4553	1.88528		0.283301	1.30168	1.43863	0.275376
0.558889	1.57832	0.0055487	10.596		-0.252674	0.198195	-2.25581	1.02514			0.327507	1.79314	0.130106	6.21192		-0.48478	0.253614	-0.885702	0.793226			0.414588	6.46463	26.5078	2.34469		-0.382384	0.810544	1.42337	0.370085
0.579231	1.89247	0.0087239	10.9834		-0.237148	0.27703	-2.05929	1.04074			1.13986	0.628169	0.16499	16.6378		0.05685	-0.201924	-0.782542	1.2211					47.7564	2.07632				1.67903	0.317294
H. Acta2 (a-SMA)					Acta2 (a-SMA) Log Transform Y=log(Y)						I. Col1a1					Col1a1 Log Transform Y=log(Y)						J. Col1a2					Col1a2 Log Transform Y=log(Y)
TdT-Osx-	TdT-Osx+	iCAFs	bone		TdT-Osx-	TdT-Osx+	iCAFs	bone			TdT-Osx-	TdT-Osx+	iCAFs	bone		TdT-Osx-	TdT-Osx+	iCAFs	bone			TdT-Osx-	TdT-Osx+	iCAFs	bone		TdT-Osx-	TdT-Osx+	iCAFs	bone
3.82	135.79	143.325	3.16359		0.582063	2.13287	2.15632	0.50018			0.18	10.81	20.2669	3.16971		-0.744727	1.03383	1.30679	0.50102			0.2	4.31	16.3408	2.0319		-0.69897	0.634477	1.21327	0.307901
7.72	421.45	89.2485	8.11572		0.887617	2.62475	1.9506	0.909327			0.14	21.9	20.8956	2252.9		-0.853872	1.34044	1.32006	3.35274			0.06	2.35	10.7992	56.5957		-1.22185	0.371068	1.03339	1.75278
7.22519	169.998	51.7505	17.8156		0.858849	2.23044	1.71391	1.2508			0.193299	5.27653	13.835	261.252		-0.713771	0.722348	1.14098	2.41706			0.0837834	1.50116	7.8904	28.8466		-1.07684	0.176428	0.897099	1.4601
		85.5334	7.46689				1.93214	0.87314					15.6297	133.321				1.19395	2.1249					7.56507	9.84264				0.878813	0.993112
K. Mmp2					Mmp2 Log Transform Y=log(Y)						L. Mmp9					Mmp9 Log Transform Y=log(Y)
TdT-Osx-	TdT-Osx+	iCAFs	bone		TdT-Osx-	TdT-Osx+	iCAFs	bone			TdT-Osx-	TdT-Osx+	iCAFs	bone		TdT-Osx-	TdT-Osx+	iCAFs	bone
0.6	11.72	49.5804	6.3756		-0.221849	1.06893	1.69531	0.804521			0.05	7.05	0.0882205	3.34365		-1.30103	0.848189	-1.05443	0.52422
1.51	55.87	37.5549	10.4126		0.178977	1.74718	1.57467	1.01756			0.11	10.35	0.0642237	10.1884		-0.958607	1.01494	-1.1923	1.00811
2.68342	36.1338	34.6751	5.10302		0.428688	1.55791	1.54002	0.707827			0.204485	7.58388	0.0996022	8.0337		-0.689339	0.879891	-1.00173	0.904916
0.834407	97.943				-0.0786219	1.99097					0.0832003	8.25001				-1.07987	0.916455
3.72843	6.45846				0.571526	0.810129					0.970497	0.603443				-0.0130056	-0.219363
M. Sp7 (Osx)					N. Sp7 (Osx)
B16-F10	susp	CAFs			PyMT	susp	CAFs
0.0189099	0.0658273	9.8723			0.00938308	0.0142858	0.386869
0.0189099	0.0417136	5.97854			0.00808533	0.018493	1.35821
	0.0158772	14.7987			0.00959997	0.02279	0.797817
						0.0144918	1.62985
