# Supplementary material for: Osterix-Cre marks distinct subsets of CD45- and CD45+ stromal populations in extra-skeletal tumors with pro-tumorigenic characteristics
Source: eLife. 2020 Aug 5;9:e54659. doi: 10.7554/eLife.54659 (PMC7428306; doi:10.7554/eLife.54659)
Supplement: Figure 3—figure supplement 1—source data 1. [file elife-54659-fig3-figsupp1-data1.xlsx]

## Sheet: Source Data-Figure3+Suppl Fig1
FACS analysis
Osx-cre;TdT (doxy)					Osx-creERT2;TdT (TAM)
Bone marrow TdTOsx+ cells					Bone marrow TdTOsx+ cells
no tumor	B16-F10	PyMT			no tumor	B16-F10
6.49	9.582	23.6			5.62	7.78
8.66	12.386	24.16			4.56	8.75
10.2	16.306	12.5			6.1	7.33
	14.56					7.121
	16.17
	14.45
	13.1
