# Supplementary material for: Osterix-Cre marks distinct subsets of CD45- and CD45+ stromal populations in extra-skeletal tumors with pro-tumorigenic characteristics
Source: eLife. 2020 Aug 5;9:e54659. doi: 10.7554/eLife.54659 (PMC7428306; doi:10.7554/eLife.54659)
Supplement: Figure 3—figure supplement 2—source data 1. [file elife-54659-fig3-figsupp2-data1.xlsx]

## Sheet: Source Data-Figure 2
Real Time PCR
A. Sp7 (Osx)						B. Runx2						C. Bglap (Ocn)
tumor TdT-Osx-	BM (+tum) TdT-Osx+	BM (no tum) TdT-Osx+				tumor TdT-Osx-	BM (+tum) TdT-Osx+	BM (no tum) TdT-Osx+				tumor TdT-Osx-	BM (+tum) TdT-Osx+	BM (no tum) TdT-Osx+
4.97	0.198161	0.999623				1.64568	49.0351	81.8885				9.79	0.0151998	0.984731
4.31	0.564257	0.36924				8.68015	67.4974	71.7684				29.12	0.101943	0.173392
3.17055	0.266137	2.46867				17.3925	34.9092	31.0934				0.0692486	0.0605254	3.81767
5.17924	1.48455					2.45626	130.991					0.434898	0.272734
7.65036												1.83534
7.3394												3.61574
D. Ibsp (Bsp)						E. Alpl (Tnap						F. S100a4 (Fsp1)
tumor TdT-Osx-	BM (+tum) TdT-Osx+	BM (no tum) TdT-Osx+				tumor TdT-Osx-	BM (+tum) TdT-Osx+	BM (no tum) TdT-Osx+				tumor TdT-Osx-	BM (+tum) TdT-Osx+	BM (no tum) TdT-Osx+
3.08446	0.0164465	0.164066				0.28915	0.00547928	0.35881				17.43	6.34341	4.82514
0.030225	0.0286933	0.0148226				0.00575206	0.0971228	0.0907174				20.03	6.25175	2.00954
1.57832	0.0396691	0.0428552				1.79314	0.0321267	1.44859				6.46463	4.06269	2.188
1.89247	0.181521					0.628169	0.113797						1.39714
G. Acta2 (a-SMA)						H. Col1a1						I. Col1a2
tumor TdT-Osx-	BM (+tum) TdT-Osx+	BM (no tum) TdT-Osx+				tumor TdT-Osx-	BM (+tum) TdT-Osx+	BM (no tum) TdT-Osx+				tumor TdT-Osx-	BM (+tum) TdT-Osx+	BM (no tum) TdT-Osx+
135.79	0.639416	4.65418				10.81	0.936441	0.115181				4.31	0.643862	5.85485
421.45	0.953624	0.749665				21.9	2.6995	4.53248				2.35	1.05927	1.48027
169.998	0.670175	1.76721				5.27653	0.425241	1.89952				1.50116	0.187868	2.46551
	1.71842						1.5355						0.433132
J. Mmp2						K. Mmp9
tumor TdT-Osx-	BM (+tum) TdT-Osx+	BM (no tum) TdT-Osx+				tumor TdT-Osx-	BM (+tum) TdT-Osx+	BM (no tum) TdT-Osx+
11.72	1.06049	0.936966				7.05	931.532	1197.61
55.87	1.25721	0.774887				10.35	1895.77	2023
36.1338	0.678442	6.37662				7.58388	1546.45	3519.56
97.943	1.70979					8.25001	4786.73
6.45846						0.603443
