# Supplementary material for: Osterix-Cre marks distinct subsets of CD45- and CD45+ stromal populations in extra-skeletal tumors with pro-tumorigenic characteristics
Source: eLife. 2020 Aug 5;9:e54659. doi: 10.7554/eLife.54659 (PMC7428306; doi:10.7554/eLife.54659)
Supplement: Figure 4—figure supplement 1—source data 1. [file elife-54659-fig4-figsupp1-data1.xlsx]

## Sheet: Source Data-Figure 7
FACS analysis
B. Bone marrow-B16-F10
TdTOsx+ CD45+	TdTOsx+ CD45-
5.87	0.553
7.49	0.206
5.96	0.118
7	0.121
