# Supplementary material for: Osterix-Cre marks distinct subsets of CD45- and CD45+ stromal populations in extra-skeletal tumors with pro-tumorigenic characteristics
Source: eLife. 2020 Aug 5;9:e54659. doi: 10.7554/eLife.54659 (PMC7428306; doi:10.7554/eLife.54659)
Supplement: Figure 4—source data 1. [file elife-54659-fig4-data1.xlsx]

## Sheet: Source Data-Figure 4
FACS analysis
B. Blood TdTOsx+ cells
no tumor	B16-F10	PyMT
0	11.112	19.5
0	12.026	19.029
0	15.787	12.874
7.11	14.47	19.89
8.06	13.5	12.51
9.05	14.08	15.449
3.1	13.9
4.6	14.7
6.05	19.8
	13
C. Blood-B16-F10				D. Blood-PyMT
TdTOsx+ CD45+	TdTOsx+ CD45-			TdTOsx+ CD45+	TdTOsx+ CD45-
13.3	0.613			18.5	1
13.2	1.51			18.8	0.229
19	0.813			12.7	0.174
12.1	0.903			19.7	0.19
10.5	0.612			12.1	0.41
11.4	0.626			14.8	0.649
15.3	0.487
13.2	1.27
13	0.499
13.2	0.879
E. Bone marrow-B16-F10				F. Bone marrow-PyMT
TdTOsx+ CD45+	TdTOsx+ CD45-			TdTOsx+ CD45+	TdTOsx+ CD45-
13.9	0.658			23.4	0.2
15.5	0.671			23.5	0.669
13.9	0.0227			12.2	0.275
12.7	0.315
13.5	0.378
9.36	0.222
12.1	0.286
16.2	0.106
E.Tumor-B16-F10				F.Tumor-PyMT
TdTOsx+ CD45+	TdTOsx+ CD45-			TdTOsx+ CD45+	TdTOsx+ CD45-
5.97	0.242			10.1	0.898
5.29	0.355			8.38	0.766
4.62	0.902			6.84	0.438
3.51	0.272			7.76	0.467
4.26	0.273
