# Supplementary material for: Osterix-Cre marks distinct subsets of CD45- and CD45+ stromal populations in extra-skeletal tumors with pro-tumorigenic characteristics
Source: eLife. 2020 Aug 5;9:e54659. doi: 10.7554/eLife.54659 (PMC7428306; doi:10.7554/eLife.54659)
Supplement: Figure 5—figure supplement 1—source data 1. [file elife-54659-fig5-figsupp1-data1.xlsx]

## Sheet: SourceData-Suppl Figure 3
Real Time PCR
Cd163l1			Wdr78			Spock2
TdTOsx- CD45+	TdTOsx+ CD45+		TdTOsx- CD45+	TdTOsx- CD45-		TdTOsx- CD45+	TdTOsx+ CD45+
0.380574	9.61261		0.812776	27.3559		0.153202	2.07222
31.2647	42.9849		0.047037	4.96888		0.0811	0.113771
9.95942	26.2041
4.9513	12.7478
