# Supplementary material for: Osterix-Cre marks distinct subsets of CD45- and CD45+ stromal populations in extra-skeletal tumors with pro-tumorigenic characteristics
Source: eLife. 2020 Aug 5;9:e54659. doi: 10.7554/eLife.54659 (PMC7428306; doi:10.7554/eLife.54659)
Supplement: Figure 6—source data 1. [file elife-54659-fig6-data1.xlsx]

## Sheet: Source Data-Figure 6
FACS analysis
A. Tumor				B. Bone marrow
TdTOsx+	TdTOsx-			TdTOsx+	TdTOsx-
33.1	64.9			28.7	69.7
12.1	85.5			9.6	89.2
12.7	85.1			11.3	87.3
C. Tumor TdTOsx+									D. Tumor TdTOsx-									E. ratioL/M
CD11b+Gr1+	CD11b+/F4/80+	CD11b+Gr1-F4/80-	CD3+	CD4+	CD8+	NK1.1+			CD11b+Gr1+	CD11b+/F4/80+	CD11b+Gr1-F4/80-	CD3+	CD4+	CD8+	NK1.1+			TdTOsx+	TdTOsx-
9.54	18.5	41.4	15.9	10.3	3.54	12.4			4.62	16.2	53.5	14.3	5.6	2.63	10.8			0.407546	0.337729
4.05	12.1	35.3	15.6	9.17	3.48	13.1			2.98	11.6	51.9	10	5.21	1.64	8.36			0.557823	0.276173
20.8	7.3	35.4	17.7	9.95	5.07	22.1			9.43	2.99	58.8	10.4	4.63	1.95	16.1			0.626772	0.372086
F. Bone marrow TdTOsx+									G. Bone marrow TdTOsx-
CD11b+Gr1+	CD11b+/F4/80+	CD11b+Gr1-F4/80-	CD3+	NK1.1+					CD11b+Gr1+	CD11b+/F4/80+	CD11b+Gr1-F4/80-	CD3+	NK1.1+
44.9	5.09	36.8	9.98	2.94					54.6	5.46	30	17	3.18
33.7	11.4	33.4	9.38	3.19					48.1	9.59	29.6	12.7	2.29
38.5	6.29	48.7	10.3	2.87					43.5	8.37	47.2	15.9	2.47
