# Supplementary material for: Osterix-Cre marks distinct subsets of CD45- and CD45+ stromal populations in extra-skeletal tumors with pro-tumorigenic characteristics
Source: eLife. 2020 Aug 5;9:e54659. doi: 10.7554/eLife.54659 (PMC7428306; doi:10.7554/eLife.54659)
Supplement: Figure 7—source data 1. [file elife-54659-fig7-data1.xlsx]

## Sheet: Source Data-Figure 7
FACS analysis
Osx-cre; TdT (doxy)
B.
	total						TdTOsx+
LSK	0.295	0.23	0.31	0.255	0.26	0.265	0.036	0.024	0.0385	0.028	0.019	0.045
LK	0.975	0.81	0.73	0.795	0.829	1.13	0.057	0.0795	0.057	0.063	0.0575	0.1275
C.
HSC	0.0042	0.0021	0.0035	0.003	0.0027	0.0024	0.0006	0.0005	0.0005	0.0004	0.0005	0.0004
MPP1	0.0039	0.0011	0.0063	0.0039	0.0052	0.0078	0.0008	0.0015	0.002	0.0013	0.0014	0.0029
MPP2	0.0065	0.0036	0.0041	0.005	0.0164	0.0126	0.0004	0.0006	0.0004	0.0004	0.0009	0.0019
MPP3	0.0205	0.0235	0.0181	0.026	0.034	0.03	0.0008	0.0023	0.0026	0.0018	0.0019	0.0035
MPP4	0.165	0.13	0.19	0.15	0.125	0.13	0.0135	0.021	0.0215	0.017	0.0083	0.023
Osx-creERT2; TdT (TAM)
D.
	total		TdTOsx+
LSK	0.52	0.63	0.06	0.071
LK	0.58	0.56	0.049	0.052
E.
HSC	0.012	0.027	0.00111	0.00131
MPP1	0.012	0.021	0.000529	0.00057
MPP2	0.0046	0.012	0.000556	0.00311
MPP3	0.011	0.069	0.000529	0.00362
MPP4	0.24	0.46	0.00476	0.021
