# Supplementary material for: Osterix-Cre marks distinct subsets of CD45- and CD45+ stromal populations in extra-skeletal tumors with pro-tumorigenic characteristics
Source: eLife. 2020 Aug 5;9:e54659. doi: 10.7554/eLife.54659 (PMC7428306; doi:10.7554/eLife.54659)
Supplement: Figure 8—source data 1. [file elife-54659-fig8-data1.xlsx]

## Sheet: Source Data-Figure 7
Real Time PCR
A. Sp7 (Osx)								B. Sp7 (Osx)
TdT-Osx-	HSCs	MPPs	CMPs	CLPs	WBM			CD3+ T cells	cDCs	macrophages
0.1	0.876427	1.17436	0.103088	0.838321	1.58212			0.0354587	0.024976	0.0541342
0.13	0.522169	0.798975	0.140604	0.445358	1.46937			0.0391806	0.0162917	0.0449724
0.444831	0.885315	1.0212	0.102103	0.625745	1.48022
	0.606756	0.69538	0.072535	0.307122	1.65383
	1.08425
	1.38743
	0.733687
	0.828979
